# Supplementary material for: Characteristic vibrational frequencies of osmium(ii) nitrosyl complexes probed by Raman spectroscopy and DFT calculations
Source: Royal Society of Chemistry journal article supplement (doi:10.1039/d2nj01713j), 2022-01-01
Supplement: d2nj01713j1.pdf [file d2nj01713j1.pdf]

# **Characteristic Vibrational Frequencies of Osmium(II) Nitrosyl Complexes Probed by Raman Spectroscopy and DFT calculations.**

## **Electronic Supplementary Information**

Nicolas Bélanger-Desmarais,<sup>a</sup> Anatolie Gavriluta,<sup>b</sup> Jean Bernard Tommasino,<sup>b</sup>  
Christian Reber<sup>\*a</sup> and Dominique Luneau<sup>\*b</sup>

\* Corresponding authors

<sup>a</sup> Département de Chimie, Université de Montréal, Montréal, H3C 3J7, Québec,  
Canada

E-mail: christian.reber@umontreal.ca

Tel: +1 514-340-4711

<sup>b</sup> Université Claude Bernard Lyon 1, Laboratoire des Multimatériaux et Interfaces  
(UMR 5615), Campus de La Doua, 69622 Villeurbanne Cedex, France

E-mail: dominique.luneau@univ-lyon1.fr

Fax: +33 472 440 618

Tel: +33 472 431 418

## Table of Contents

|                                                                                                                                                                                                                                                                                                                                                                    |    |
|--------------------------------------------------------------------------------------------------------------------------------------------------------------------------------------------------------------------------------------------------------------------------------------------------------------------------------------------------------------------|----|
| Table S1. Calculated optimized structure of singlet ground state of <i>cis</i> -[Os(NO)Cl <sub>4</sub> (Hpz)] <sup>-</sup> . .....                                                                                                                                                                                                                                 | 3  |
| Table S2. Calculated optimized structure of singlet ground state of <i>trans</i> -[Os(NO)Cl <sub>4</sub> (Hpz)] <sup>-</sup> . .....                                                                                                                                                                                                                               | 3  |
| Table S3. Comparison of selected bond lengths and angles of <i>cis</i> -(n-Bu <sub>4</sub> N)[Os(NO)Cl <sub>4</sub> (Hpz)] obtained from the published crystal structure with the calculated values obtained by DFT calculation on the isolated anionic complex in the gas phase at the B3LYP/MWB60(Os)/6-31G*(other atoms) level of theory (Gaussian 09). .....   | 4  |
| Table S4. Comparison of selected bond lengths and angles of <i>trans</i> -(n-Bu <sub>4</sub> N)[Os(NO)Cl <sub>4</sub> (Hpz)] obtained from the published crystal structure with the calculated values obtained by DFT calculation on the isolated anionic complex in the gas phase at the B3LYP/MWB60(Os)/6-31G*(other atoms) level of theory (Gaussian 09). ..... | 4  |
| Figure S1. Temperature-dependent Raman spectra ( $\lambda_{exc} = 785$ nm) of <i>cis</i> -(n-Bu <sub>4</sub> N)[Os(NO)Cl <sub>4</sub> (Hpz)] (1). .....                                                                                                                                                                                                            | 5  |
| Figure S2. Temperature-dependent Raman spectra ( $\lambda_{exc} = 785$ nm) of <i>trans</i> -(n-Bu <sub>4</sub> N)[Os(NO)Cl <sub>4</sub> (Hpz)] (2). .....                                                                                                                                                                                                          | 6  |
| Figure S3. Temperature-dependent Raman spectra ( $\lambda_{exc} = 785$ nm) of <i>cis</i> -(n-Bu <sub>4</sub> N)[Os(NO)Cl <sub>4</sub> (Hind)] (3). .....                                                                                                                                                                                                           | 7  |
| Figure S4. Temperature-dependent Raman spectra ( $\lambda_{exc} = 785$ nm) of <i>trans</i> -(n-Bu <sub>4</sub> N)[Os(NO)Cl <sub>4</sub> (Hind)] (4). .....                                                                                                                                                                                                         | 8  |
| Figure S5. Temperature-dependent Raman spectra ( $\lambda_{exc} = 785$ nm) of <i>cis</i> -(n-Bu <sub>4</sub> N)[Os(NO)Cl <sub>4</sub> (Him)] (5). .....                                                                                                                                                                                                            | 9  |
| Figure S6. Temperature-dependent Raman spectra ( $\lambda_{exc} = 785$ nm) of <i>mer</i> (Cl), <i>trans</i> -(NO,O)-(n-Bu <sub>4</sub> N) <sub>2</sub> [Os(NO)Cl <sub>3</sub> (ox)] (6). .....                                                                                                                                                                     | 10 |
| Figure S7. Temperature-dependent Raman spectra ( $\lambda_{exc} = 785$ nm) of <i>mer</i> (Cl), <i>trans</i> -(NO,O)-(n-Bu <sub>4</sub> N)[Os(NO)Cl <sub>3</sub> (gly)]. .....                                                                                                                                                                                      | 11 |

**Table S1.** Calculated optimized structure of singlet ground state of *cis*-[Os(NO)Cl<sub>4</sub>(Hpz)]-.

| Atoms | X           | Y           | Z           |
|-------|-------------|-------------|-------------|
| Os    | -0.42923200 | 0.01506100  | 0.05987000  |
| Cl    | -0.15702200 | -2.46797100 | 0.12615500  |
| Cl    | -0.08880500 | -0.10314300 | -2.31645800 |
| Cl    | -0.56539300 | 2.44662900  | -0.12058500 |
| Cl    | -2.80471200 | -0.19662500 | -0.27854200 |
| O     | -0.69512900 | 0.10496300  | 2.96423800  |
| N     | 1.71027600  | 0.17027800  | 0.12584200  |
| N     | 2.46912200  | -0.93829100 | 0.05392300  |
| H     | 1.95321000  | -1.82506200 | 0.00069300  |
| N     | -0.60154300 | 0.07401100  | 1.79635100  |
| C     | 3.77902900  | -0.63064100 | 0.02879700  |
| H     | 4.53231400  | -1.40272400 | -0.03278200 |
| C     | 3.87515000  | 0.75323400  | 0.09689500  |
| H     | 4.77672200  | 1.34770400  | 0.09923600  |
| C     | 2.54761700  | 1.21136200  | 0.15213100  |
| H     | 2.13546300  | 2.20886400  | 0.18937900  |

**Table S2.** Calculated optimized structure of singlet ground state of *trans*-[Os(NO)Cl<sub>4</sub>(Hpz)]-.

| Atoms | X           | Y           | Z           |
|-------|-------------|-------------|-------------|
| Os    | -0.50587800 | 0.00626200  | 0.00000400  |
| Cl    | -0.28297400 | 0.01029800  | 2.42559500  |
| Cl    | -0.17444800 | -2.44903600 | -0.00000500 |
| Cl    | -0.28503900 | 0.00972800  | -2.42582500 |
| Cl    | -0.52941900 | 2.43412200  | -0.00011800 |
| O     | -3.39905200 | -0.23308800 | 0.00160700  |
| N     | 1.68224900  | 0.15122000  | -0.00066700 |
| N     | 2.44225300  | -0.95680700 | -0.00003300 |
| H     | 1.93472300  | -1.84681400 | 0.00042700  |
| N     | -2.23584400 | -0.13188300 | 0.00082400  |
| C     | 3.75251800  | -0.65282400 | 0.00014900  |
| H     | 4.50402300  | -1.42900600 | 0.00069000  |
| C     | 3.84901400  | 0.73235300  | -0.00044200 |
| H     | 4.75018300  | 1.32727000  | -0.00056700 |
| C     | 2.52144200  | 1.19092600  | -0.00089400 |
| H     | 2.11372800  | 2.19000200  | -0.00143600 |

**Table S3.** Comparison of selected bond lengths and angles of *cis*-(*n*-Bu<sub>4</sub>N)[Os(NO)Cl<sub>4</sub>(Hpz)] obtained from the published crystal structure with the calculated values obtained by DFT calculation on the isolated anionic complex in the gas phase at the B3LYP/MWB60(Os)/6-31G\*(other atoms) level of theory (Gaussian 09).

| <b>Geometric parameters</b>                     | <b>Exp.</b> | <b>Calc.</b> | <b>Diff. (%)</b> |
|-------------------------------------------------|-------------|--------------|------------------|
| Os-N(Hpz) bond length (Å)                       | 2.082(3)    | 2.146        | 3.1              |
| Average of Os-Cl <sub>eq</sub> bond lengths (Å) | 2.367(1)    | 2.450        | 3.5              |
| Os-Cl <sub>ax</sub> bond length (Å)             | 2.3695(11)  | 2.404        | 1.4              |
| Os-N(NO) bond length (Å)                        | 1.733(4)    | 1.746        | 0.8              |
| N-O bond length (Å)                             | 1.153(4)    | 1.172        | 1.7              |
| Os-N-O angle (°)                                | 178.1(3)    | 178.8        | 0.4              |

**Table S4.** Comparison of selected bond lengths and angles of *trans*-(*n*-Bu<sub>4</sub>N)[Os(NO)Cl<sub>4</sub>(Hpz)] obtained from the published crystal structure with the calculated values obtained by DFT calculation on the isolated anionic complex in the gas phase at the B3LYP/MWB60(Os)/6-31G\*(other atoms) level of theory (Gaussian 09).

| <b>Geometric parameters</b>                     | <b>Exp.</b> | <b>Calc.</b> | <b>Diff. (%)</b> |
|-------------------------------------------------|-------------|--------------|------------------|
| Os-N(Hpz) bond length (Å)                       | 2.116(3)    | 2.193        | 3.6              |
| Average of Os-Cl <sub>eq</sub> bond lengths (Å) | 2.368(1)    | 2.444        | 3.2              |
| Os-N(NO) bond length (Å)                        | 1.736(4)    | 1.735        | -0.1             |
| N-O bond length (Å)                             | 1.136(4)    | 1.168        | 2.8              |
| Os-N-O angle (°)                                | 176.6(4)    | 179.6        | 1.7              |

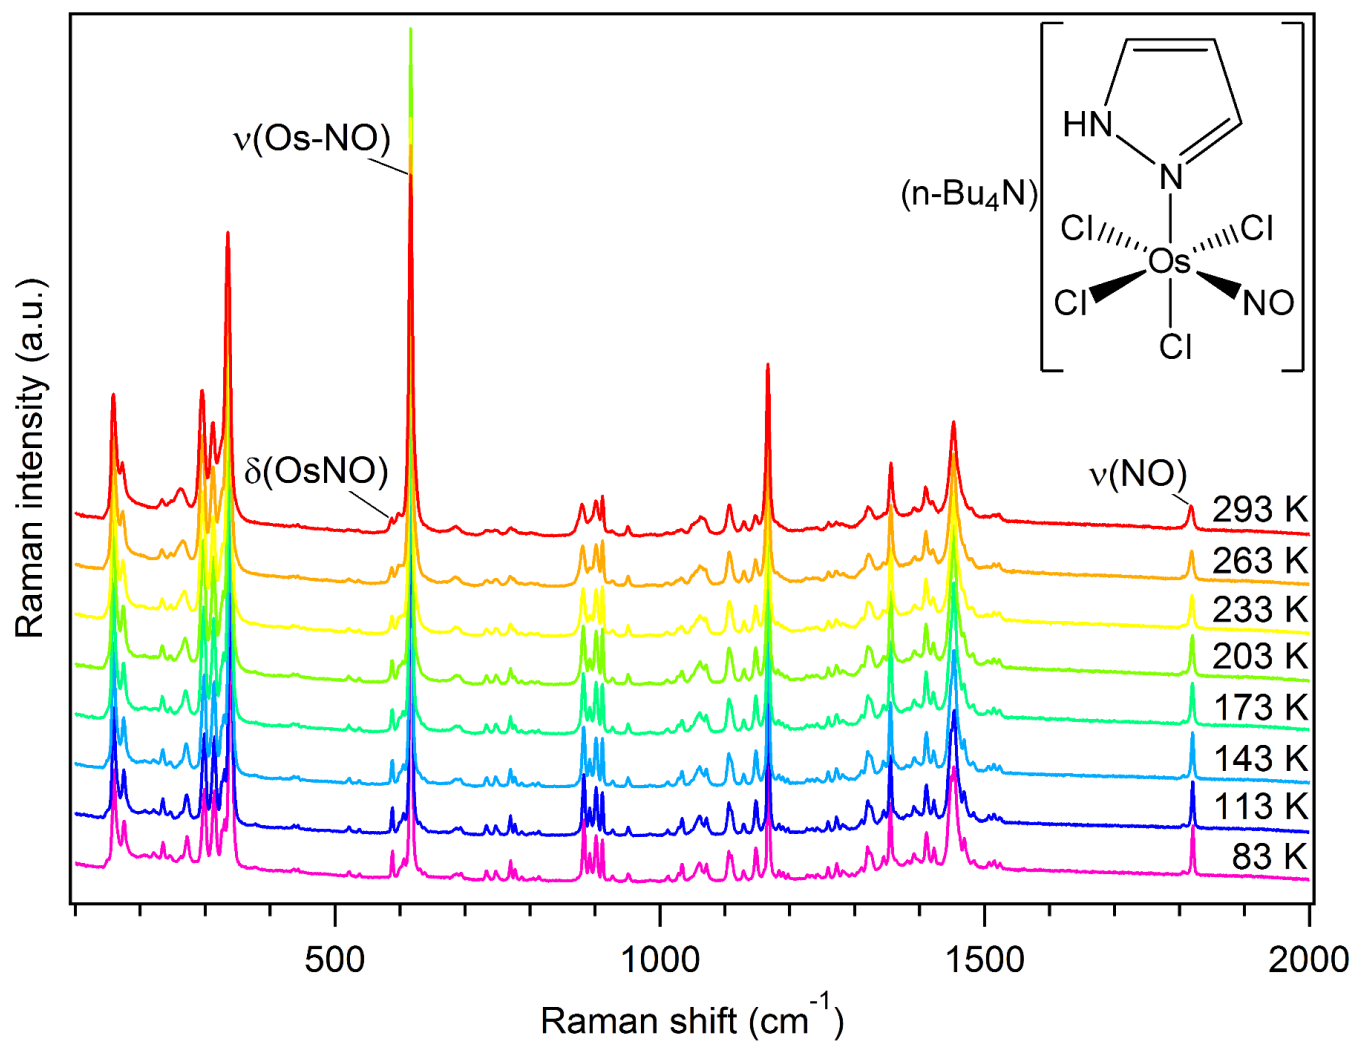

**Figure S1.** Temperature-dependent Raman spectra ( $\lambda_{\text{exc}} = 785 \text{ nm}$ ) of *cis*-(*n*-Bu<sub>4</sub>N)[Os(NO)Cl<sub>4</sub>(Hpz)] (1).

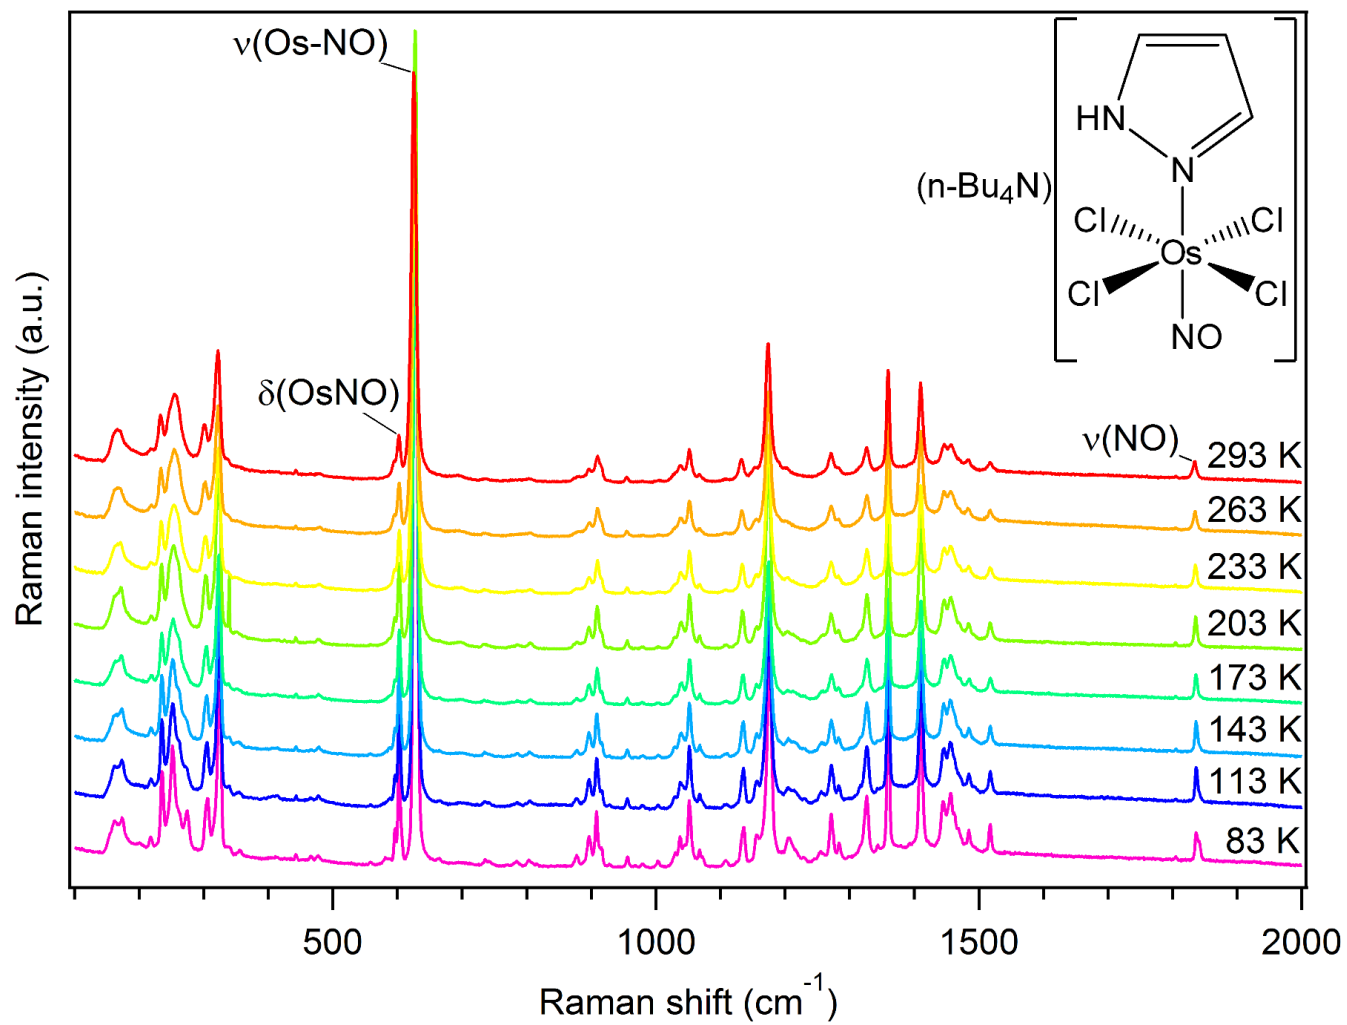

**Figure S2.** Temperature-dependent Raman spectra ( $\lambda_{\text{exc}} = 785 \text{ nm}$ ) of *trans*-(*n*-Bu<sub>4</sub>N)[Os(NO)Cl<sub>4</sub>(Hpz)] (2).

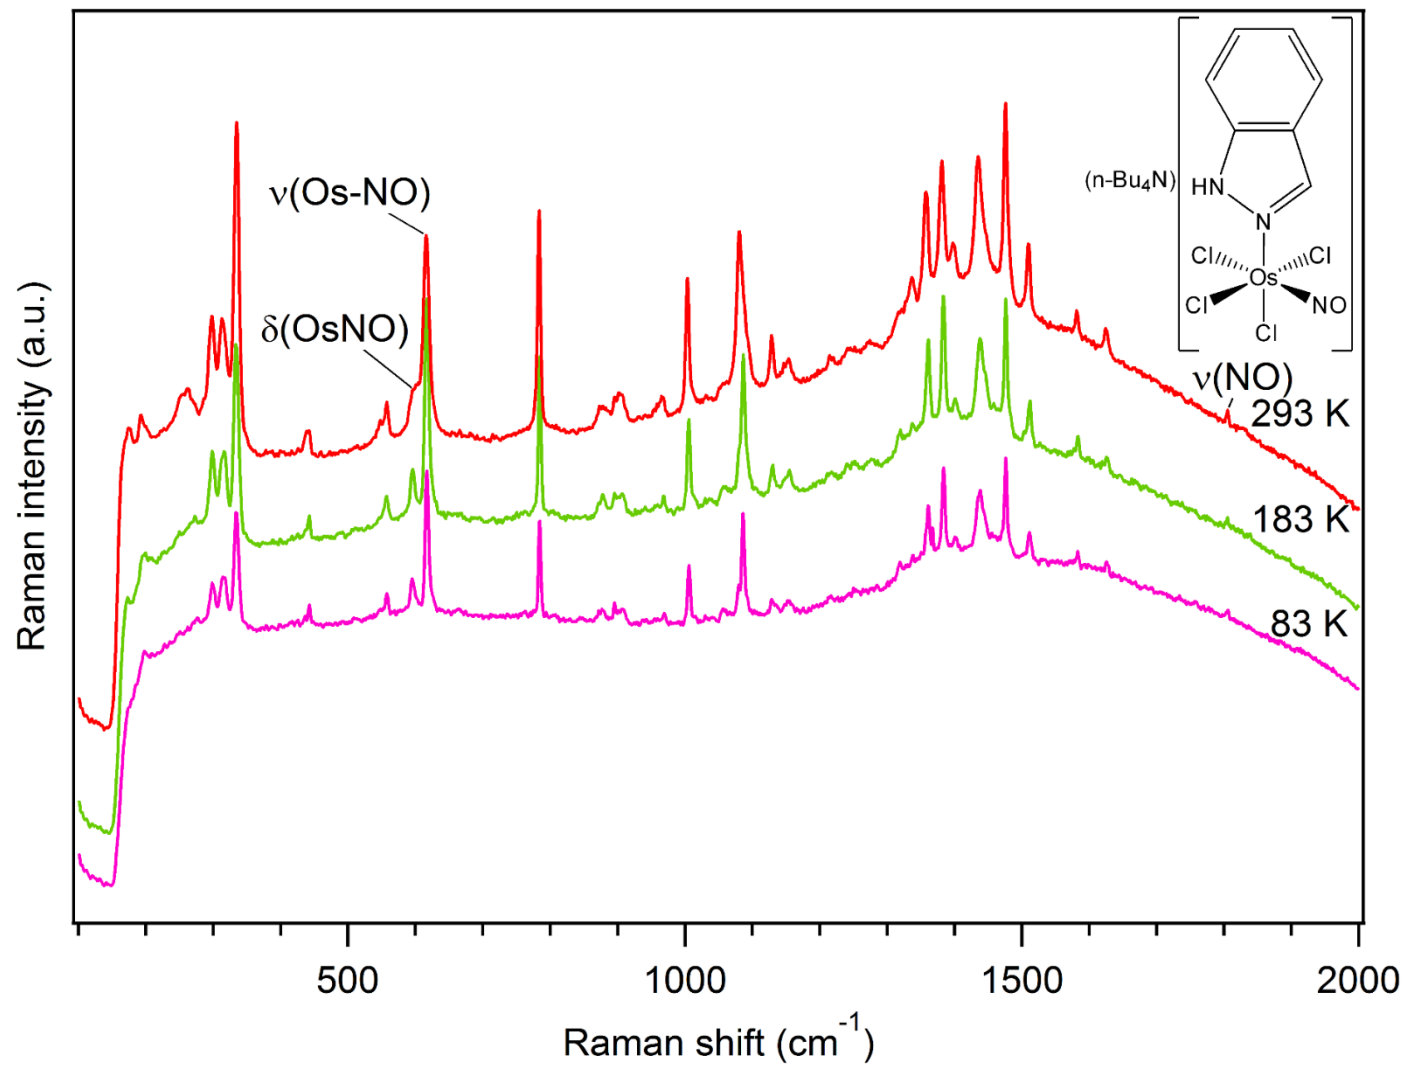

**Figure S3.** Temperature-dependent Raman spectra ( $\lambda_{\text{exc}} = 785 \text{ nm}$ ) of *cis*-(*n*-Bu<sub>4</sub>N)[Os(NO)Cl<sub>4</sub>(Hind)] (3).

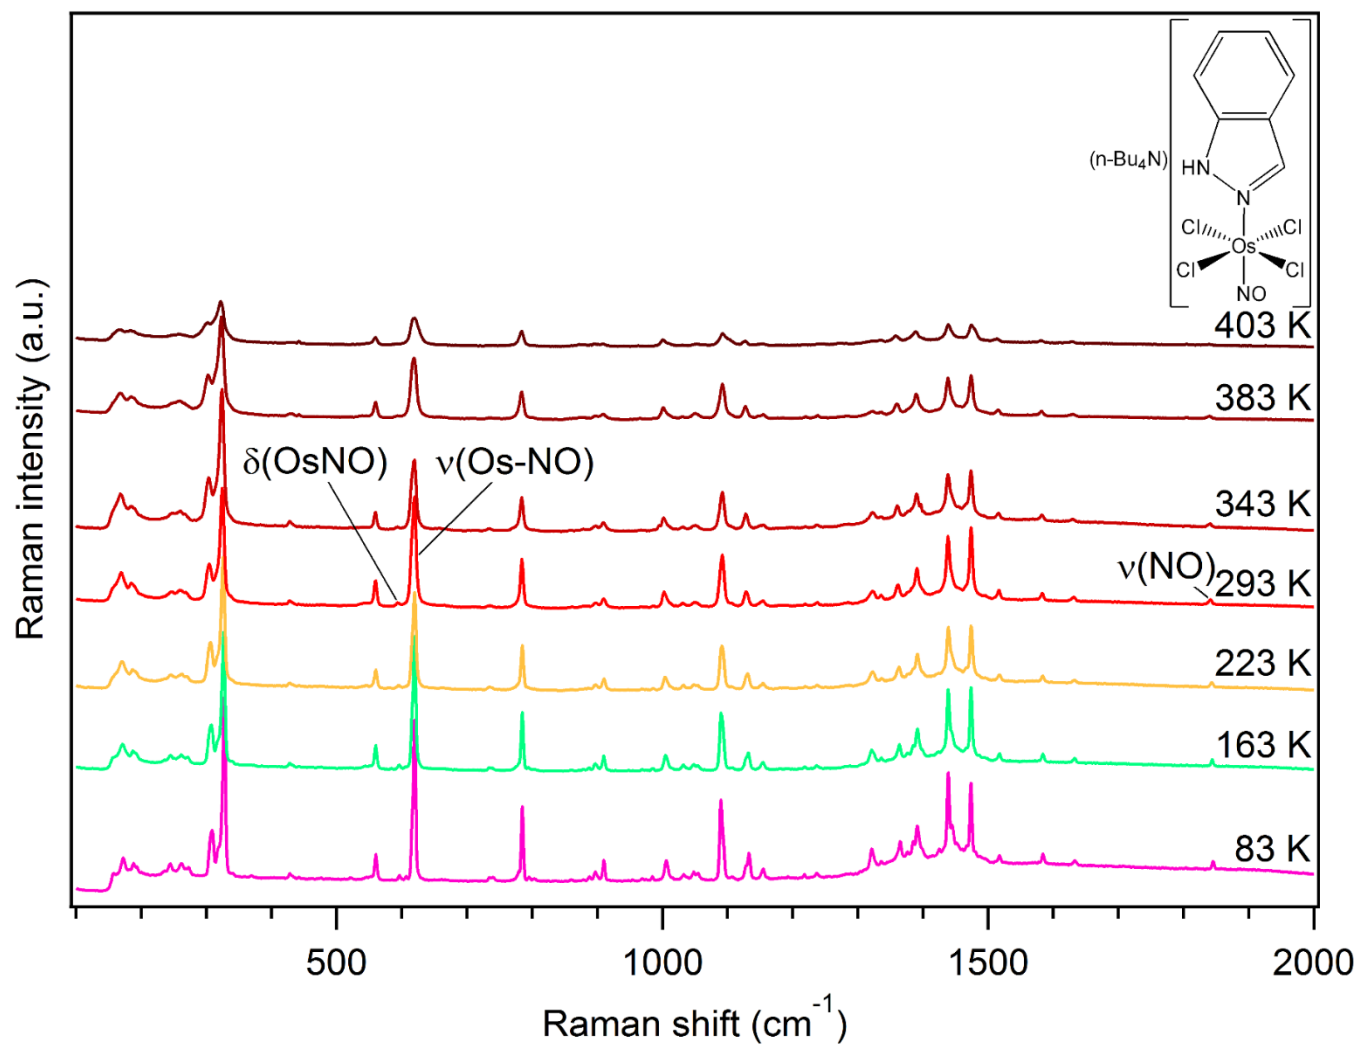

**Figure S4.** Temperature-dependent Raman spectra ( $\lambda_{\text{exc}} = 785 \text{ nm}$ ) of *trans*-(*n*-Bu<sub>4</sub>N)[Os(NO)Cl<sub>4</sub>(Hind)] (**4**).



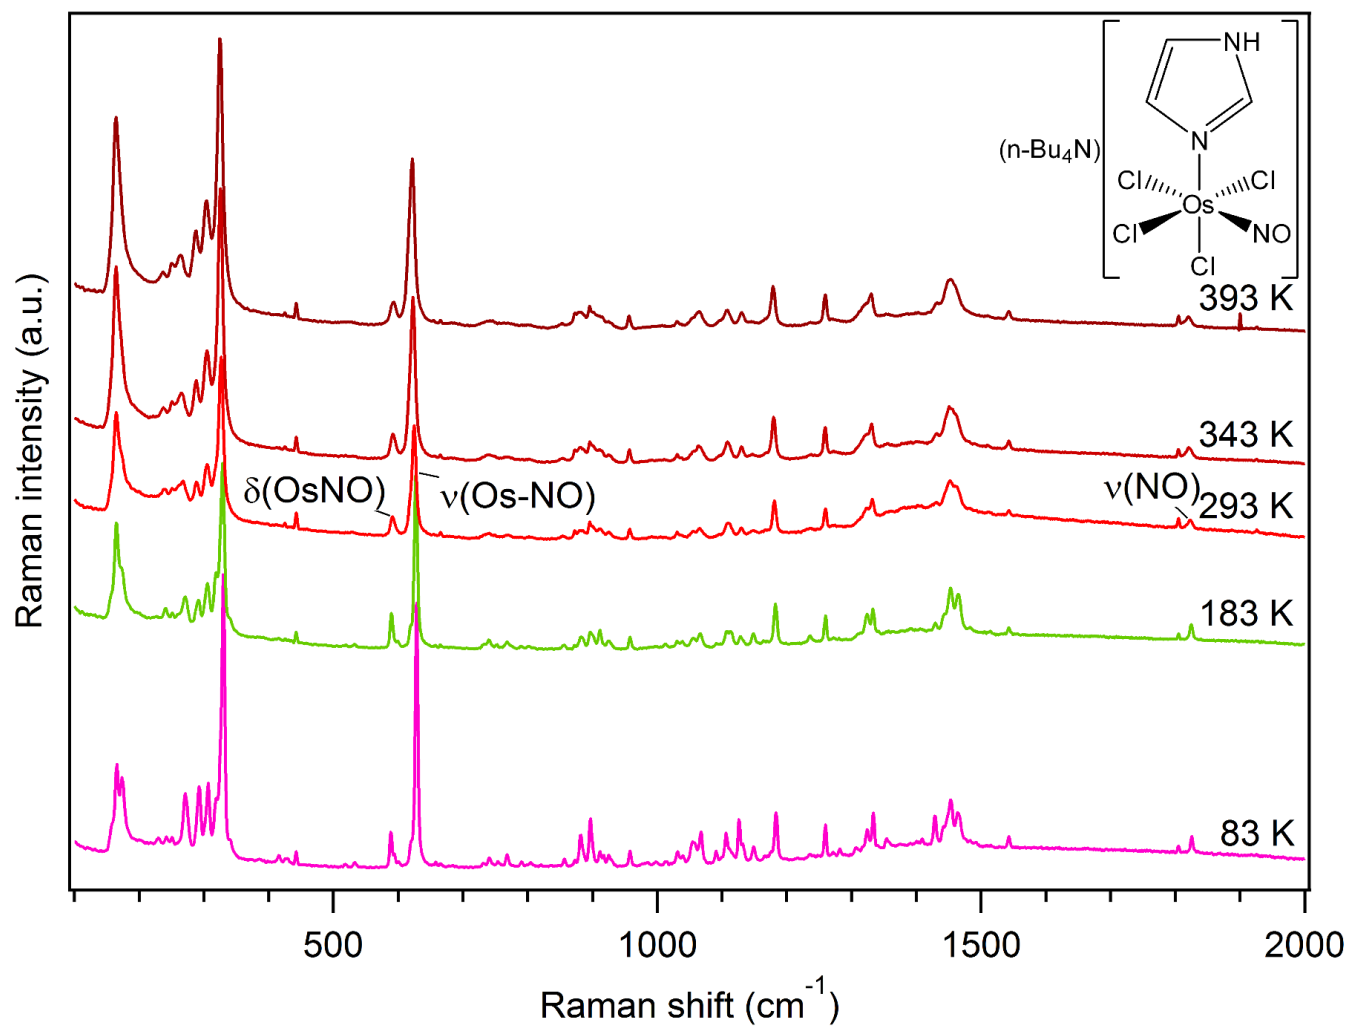

**Figure S5.** Temperature-dependent Raman spectra ( $\lambda_{\text{exc}} = 785 \text{ nm}$ ) of *cis*-(*n*-Bu<sub>4</sub>N)[Os(NO)Cl<sub>4</sub>(Him)] (5).

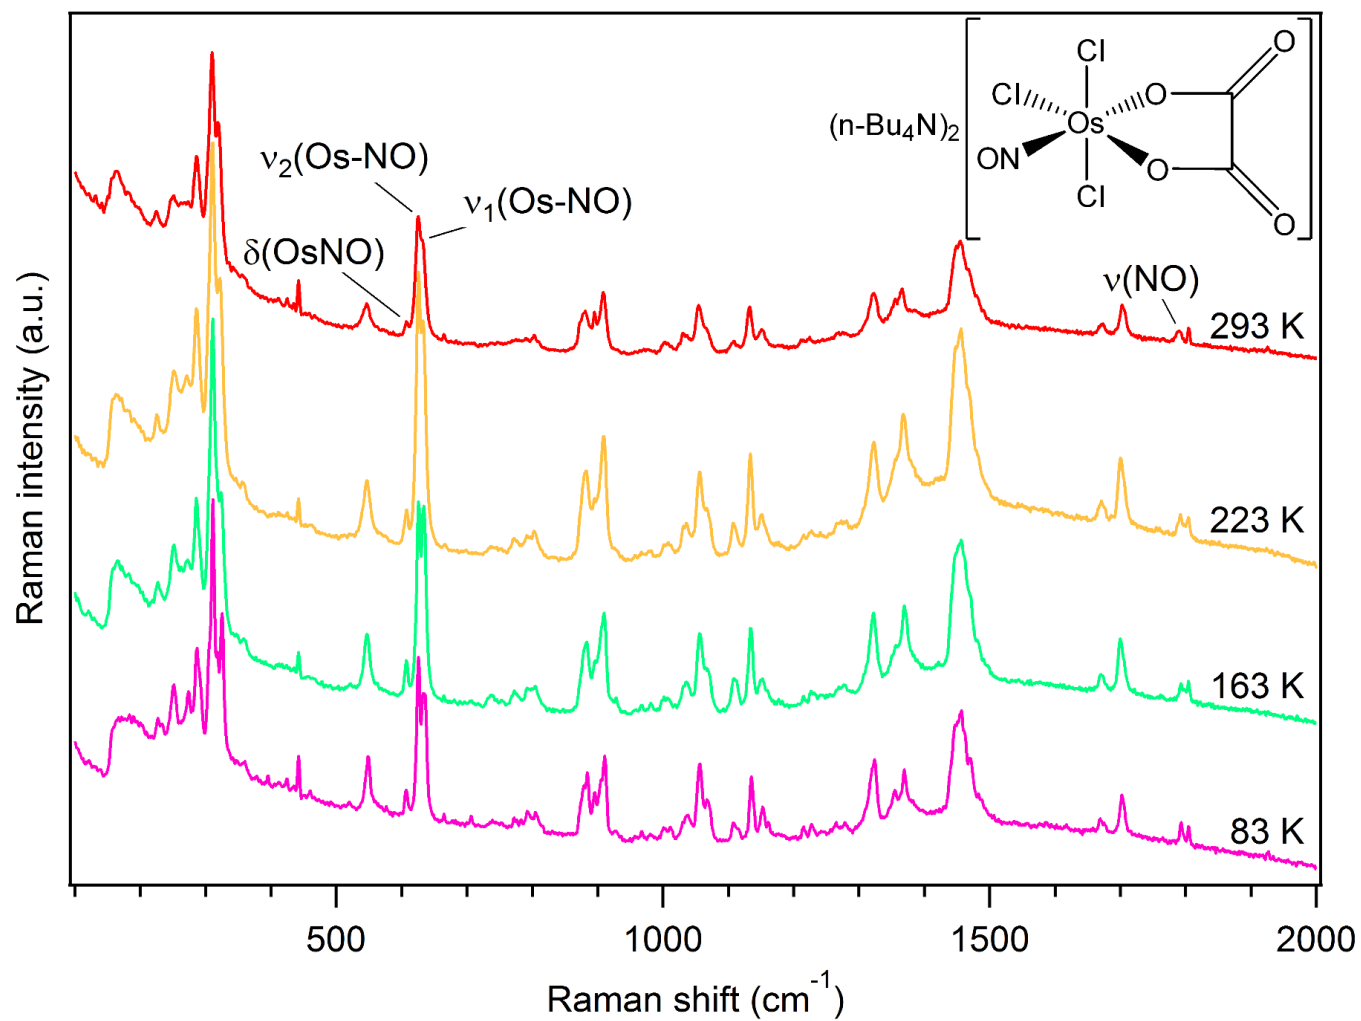

**Figure S6.** Temperature-dependent Raman spectra ( $\lambda_{\text{exc}} = 785 \text{ nm}$ ) of *mer*(Cl), *trans*-(NO,O)-(n-Bu<sub>4</sub>N)<sub>2</sub>[Os(NO)Cl<sub>3</sub>(ox)] (6).

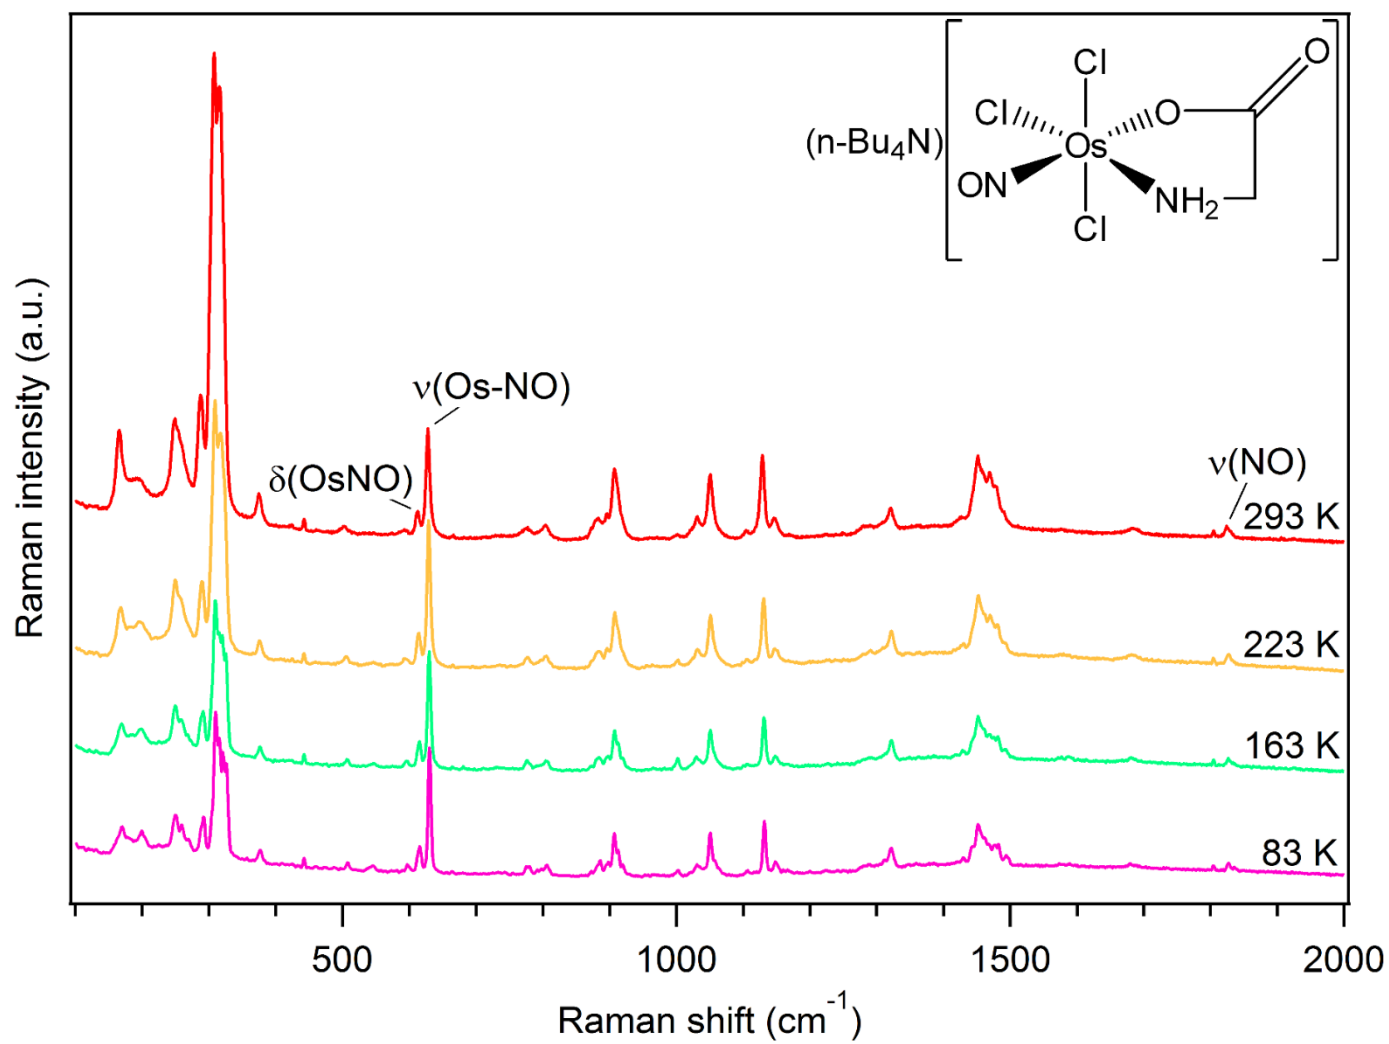

**Figure S7.** Temperature-dependent Raman spectra ( $\lambda_{\text{exc}} = 785 \text{ nm}$ ) of *mer*(Cl), *trans*-(NO,O)-(n-Bu<sub>4</sub>N)[Os(NO)Cl<sub>3</sub>(gly)] (7).
